# Supplementary material for: Detection of Histone H3 mutations in cerebrospinal fluid-derived tumor DNA from children with diffuse midline glioma
Source: PubMed Central journal article supplement (PMC5392913; doi:10.1186/s40478-017-0436-6), 2017-04-17
Supplement: 40478_2017_436_MOESM4_ESM.pdf [file 40478_2017_436_MOESM4_ESM.pdf]

Figure S4.

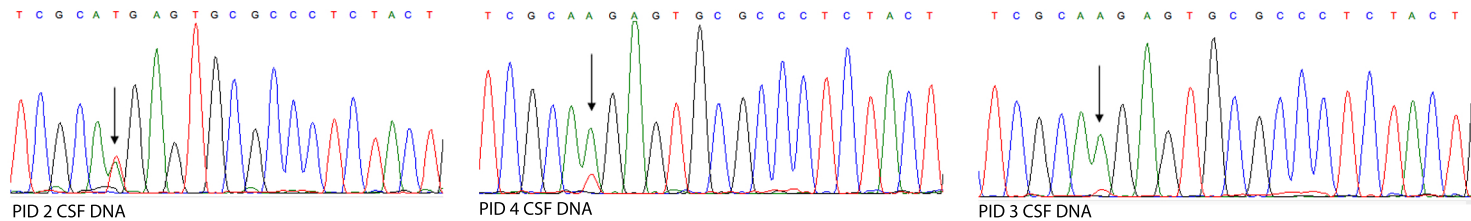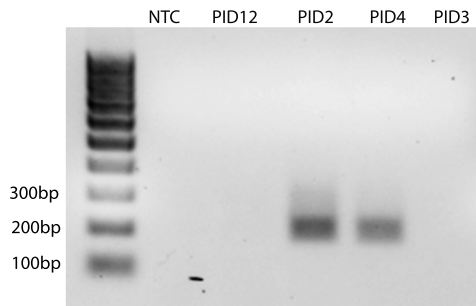

KEY: NTC = no template control; CSF DNA = CSF-derived DNA
